# Supplementary material for: Richer gut microbiota with distinct metabolic profile in HIV infected Elite Controllers
Source: PubMed Central journal article supplement (PMC5524949; doi:10.1038/s41598-017-06675-1), 2017-07-24
Supplement: 41598_2017_6675_MOESM1_ESM.pdf [file 41598_2017_6675_MOESM1_ESM.pdf]

# Supplementary information

## Richer gut microbiota with distinct metabolic profile in HIV infected Elite Controllers

Jan VESTERBACKA<sup>1,\*</sup>, Javier RIVERA<sup>2,\*</sup>, Kajsa NOYAN<sup>3</sup>, Mariona Parera<sup>2</sup>, Ujjwal Neogi<sup>3</sup>, Malu CALLE<sup>4</sup>, Roger PAREDES<sup>2,4,5,6</sup>, Anders SÖNNERBORG<sup>1,3</sup>, Marc NOGUERA-JULIAN<sup>2,4</sup>, Piotr NOWAK<sup>1</sup>

<sup>1</sup>Department of Medicine Huddinge, Unit of Infectious Diseases, Karolinska Institutet, Karolinska University Hospital, Stockholm, Sweden; <sup>2</sup>IrsiCaixa & AIDS Unit, Hospital Universitari Germans Trias i Pujol, Universitat Autònoma de Barcelona, Badalona, Spain; <sup>3</sup>Department of Laboratory Medicine, Division of Clinical Microbiology, Karolinska Institutet, Karolinska University Hospital, Stockholm, Sweden; <sup>4</sup>Universitat de Vic-Universitat Central de Catalunya, Catalonia, Spain; <sup>5</sup>Universitat Autònoma de Barcelona, 08193 Bellaterra, Catalonia, Spain; <sup>6</sup>HIV Unit & Lluita Contra la SIDA Foundation, Hospital Universitari Germans Trias i Pujol, Ctra de Canyet s/n, 08916 Badalona, Catalonia, Spain

\*The authors contributed equally to this work

**Supplementary Table 1. Metadata of study subjects**

|                                     | EC (n=16) | Naive (n=32) | Negative (n=16) |
|-------------------------------------|-----------|--------------|-----------------|
| <b>Antibiotics<sup>1</sup></b>      | 2         | 6            | 2               |
| <b>Probiotics</b>                   | 1         | 2            | 1               |
| <b>Special diet<sup>2</sup></b>     | 2         | 0            | 1               |
| <b>Smoking</b>                      | 6         | 8            | 2               |
| <b>Diabetes</b>                     | 1         | 2            | 1               |
| <b>Other medication</b>             | 11        | 9            | 4               |
| <b>Travelled abroad<sup>3</sup></b> | 5         | NA           | 1               |

<sup>1</sup>Within 3 months from inclusion

<sup>2</sup>Lactose, gluten free, vegan, vegetarian (EC: one lactose/gluten free diet, one vegetarian. Negative: one lactose/gluten free diet)

<sup>3</sup>More than 4 weeks during the last 12 months before inclusion

NA – not available

Figure S1

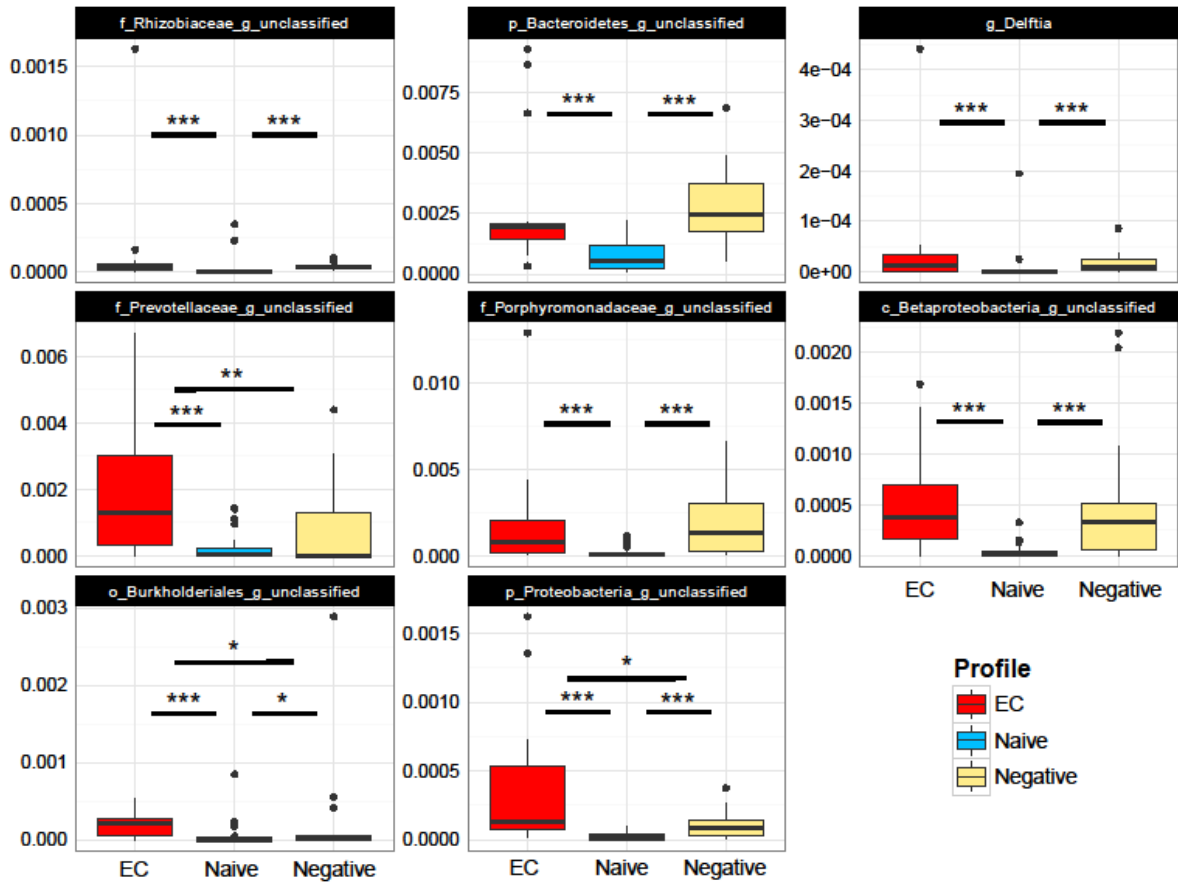

**Figure S1. Significant differences in composition of fecal microbiota between EC, naive and negative.** The abundance of bacterial taxa at genus level. Differences in taxa abundances were analyzed via Kruskal-Wallis ranked based test and Benjamini-Hochberg was used for correction of multiple testing. Adjusted p-value < 0.01 was considered significant for Kruskal-Wallis. Dunn's post-hoc pairwise analyses: \*p<0.05, \*\*p<0.01, \*\*\*p<0.001. Box plots represent median (black horizontal line), 25th and 75th quartiles (edge of boxes), upper and lower extremes (whiskers). Outliers are represented by a single data point.

Figure S2

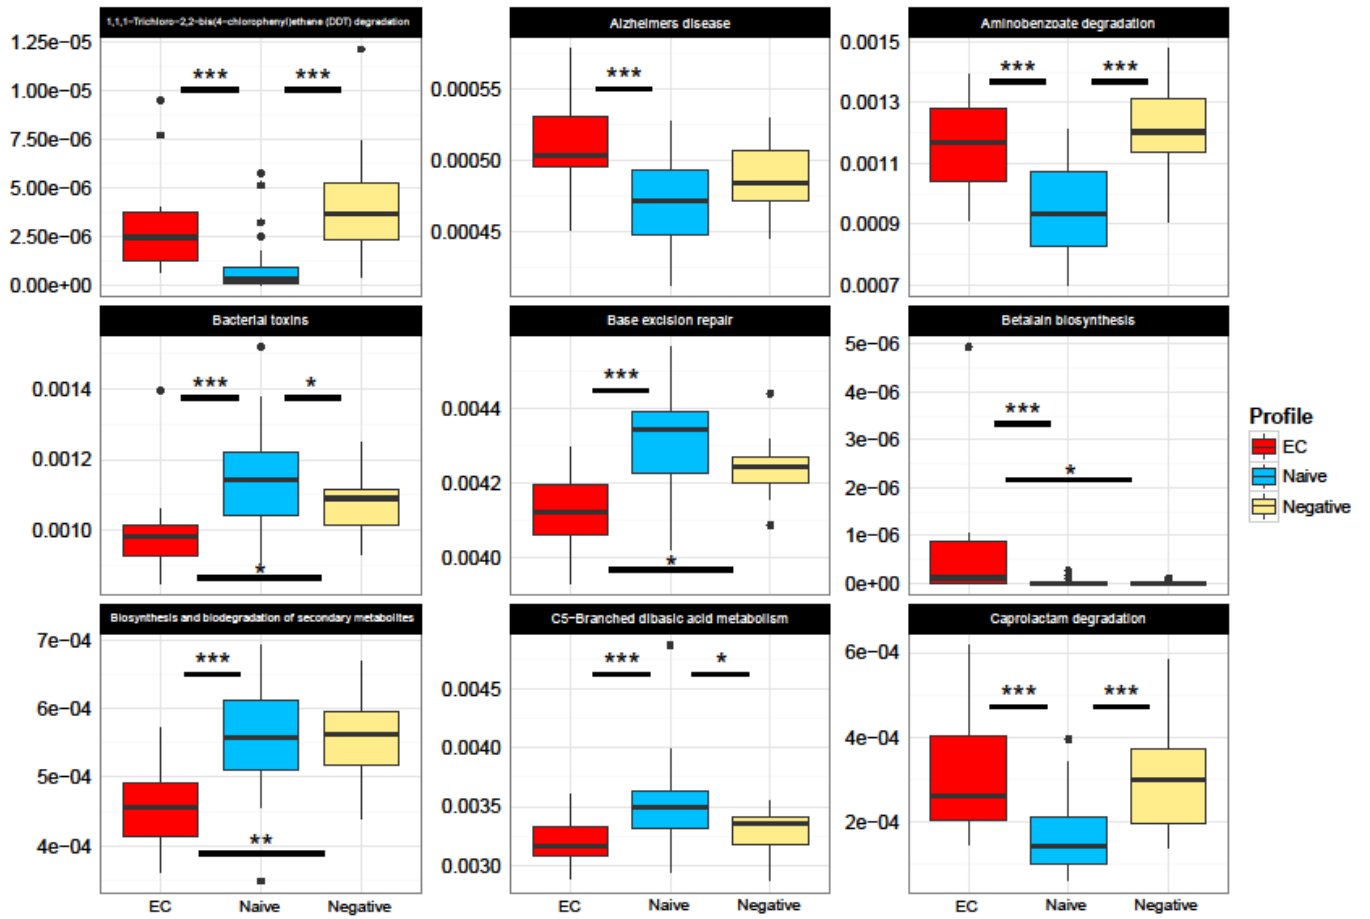

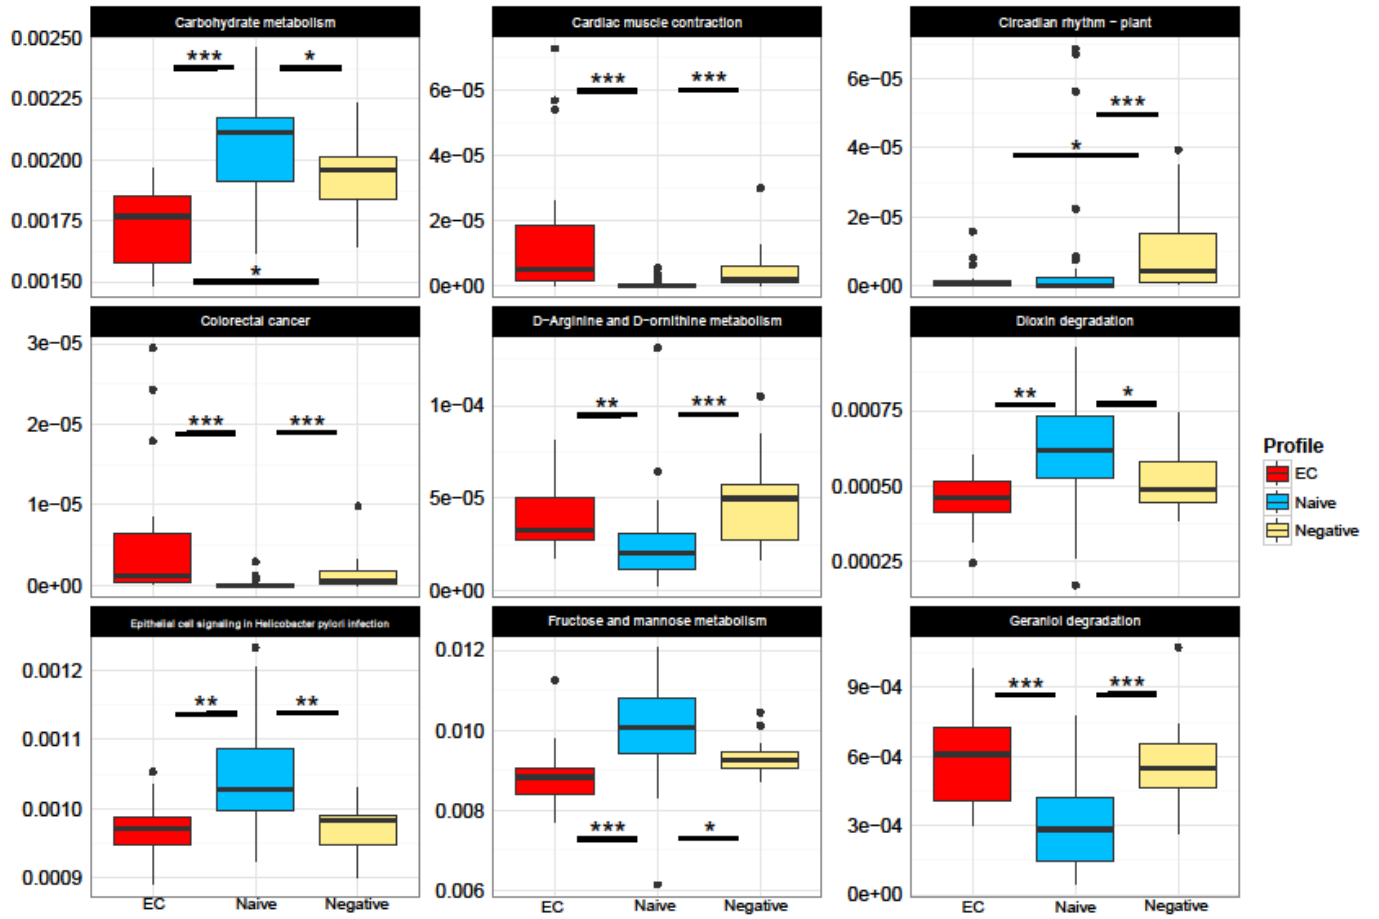

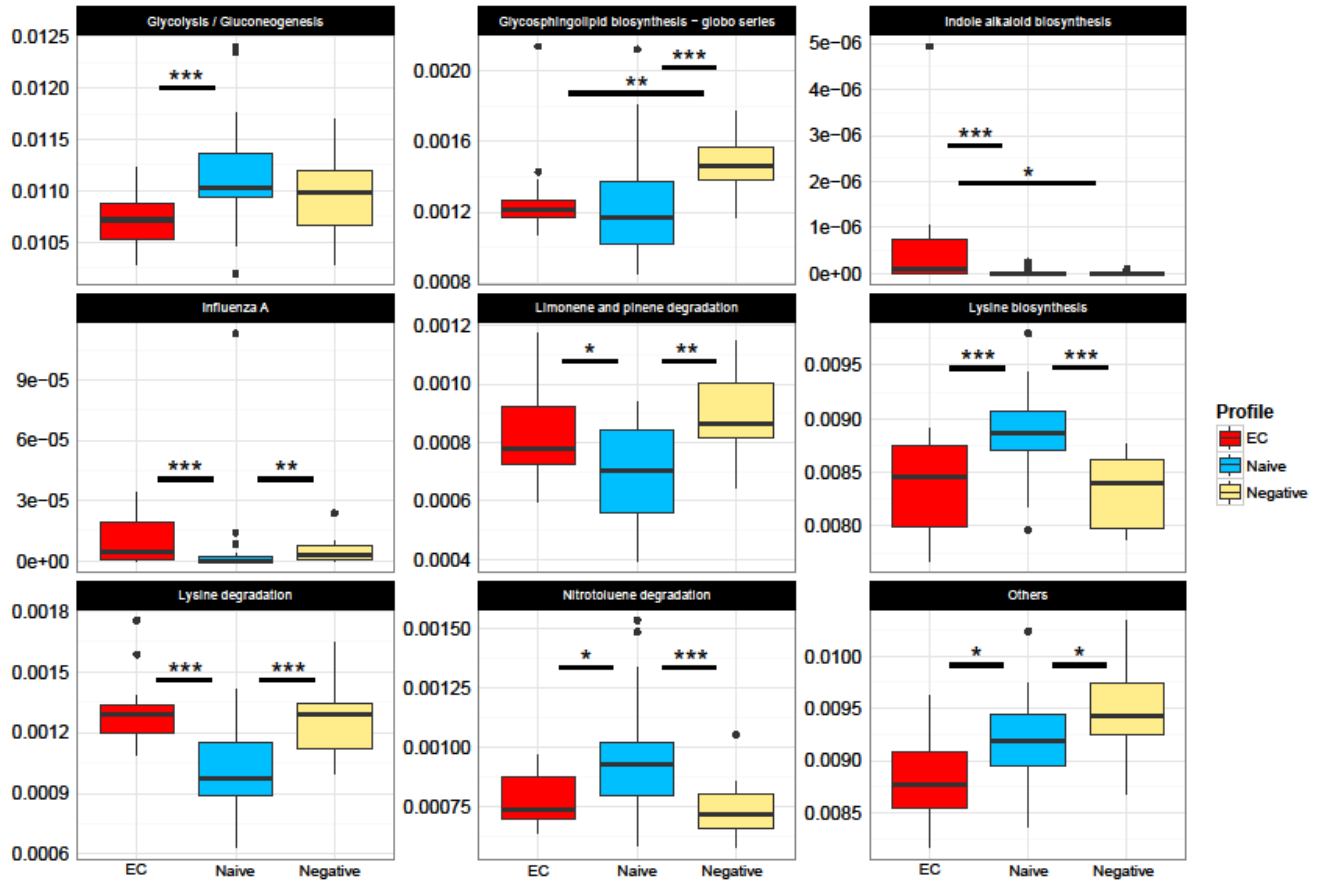

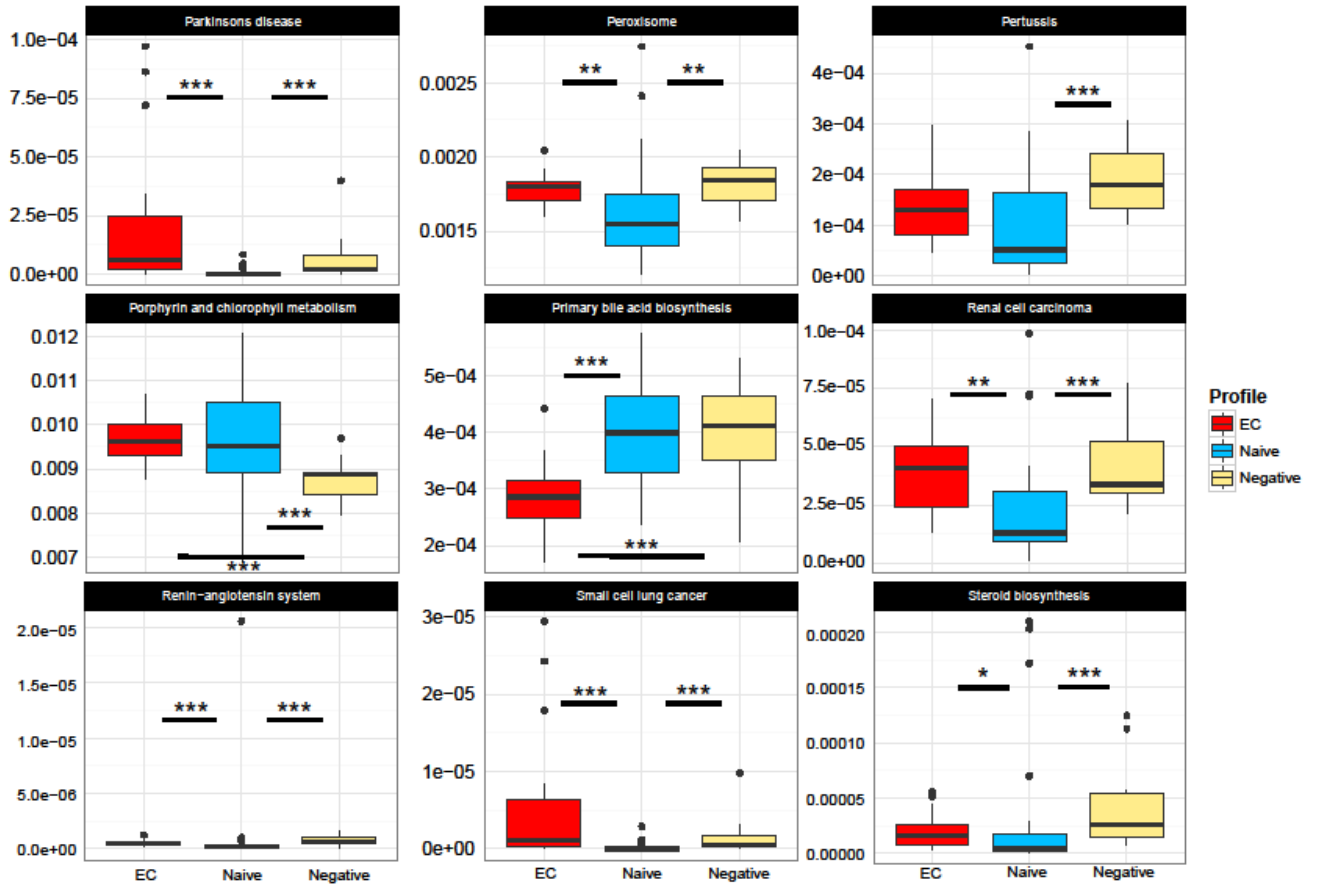

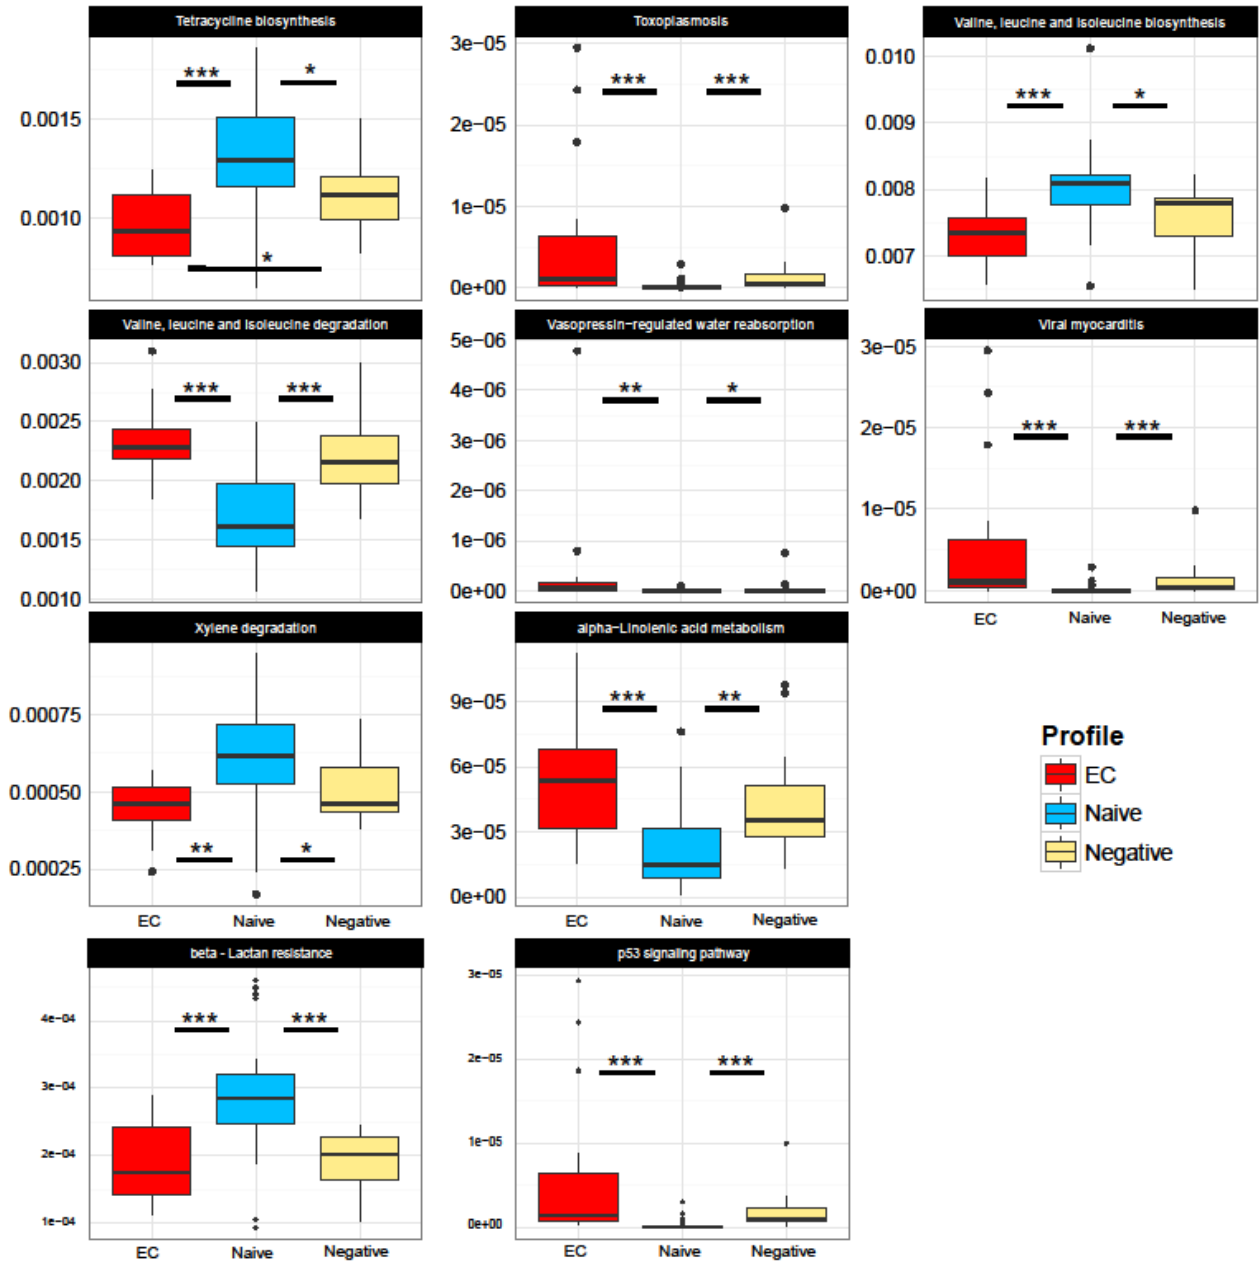

**Figure S2. Predicted functional content of gut microbiota reveal significant differences between EC and naive/controls.** Microbiome function was inferred using PICRUSt analysis. Differences in predicted gut microbiota functionality are shown in (a) and (b). Kruskal – Wallis rank-based test was applied, and Benjamini – Hochberg correction was used to correct for multiple testing. Adjusted p-value < 0.01 was considered significant for Kruskal-Wallis. Dunn`s post-hoc pairwise analyses: \*p<0.05, \*\*p<0.01, \*\*\*p<0.001. Box plots represent median (black horizontal line), 25th and 75th quartiles (edge of boxes), upper and lower extremes (whiskers). Outliers are represented by a single data point.
